# Supplementary material for: Rational hopping of a peptidic scaffold into non-peptidic scaffolds: structurally novel potent proteasome inhibitors derived from a natural product, belactosin A
Source: Royal Society of Chemistry journal article supplement (doi:10.1039/c3cc48818g), 2014-01-01
Supplement: c3cc48818g.pdf [file c3cc48818g.pdf]

## Supporting Information

### Rational Hopping of a Peptidic Scaffold into Non-Peptidic Scaffolds: Structurally Novel Potent Proteasome Inhibitors Derived from a Natural Product, Belactosin A

Shuhei Kawamura,<sup>a</sup> Yuka Unno,<sup>c</sup> Takatsugu Hirokawa,<sup>d</sup> Akira Asai,<sup>c</sup> Mitsuhiro Arisawa,<sup>e</sup> and Satoshi Shuto\*,<sup>a,b</sup>.

<sup>a</sup>Faculty of Pharmaceutical Sciences and <sup>b</sup>Center for Research and Education on Drug Discovery, Hokkaido University, Kita-12, Nishi-6, Kita-ku, Sapporo 060-0812, Japan

<sup>c</sup>Graduate School of Pharmaceutical Sciences, University of Shizuoka, Yada, Shizuoka 422-8526, Japan

<sup>d</sup>Computational Biology Research Center (CBRC), National Institute of Advanced Industrial Science and Technology (AIST), 2-4-7, Aomi, Koutou-ku, Tokyo 135-0064, Japan

<sup>e</sup>Graduate School of Pharmaceutical Sciences, Osaka University, 1-6 Yamada-oka, Suita, Osaka 565-0871, Japan

#### Table of contents

|                                                              |     |
|--------------------------------------------------------------|-----|
| General methods and materials                                | S2  |
| Synthetic procedures for <b>5-8</b>                          | S2  |
| Synthetic procedures for <b>9</b> and <b>11</b>              | S5  |
| Synthetic procedures for <b>10</b> and <b>12</b>             | S8  |
| Flexible alignment of compounds <b>5-12</b>                  | S12 |
| Proteasomes assay                                            | S13 |
| Cell proliferation assay                                     | S13 |
| BEI and SEI values of analogs of <b>4</b> with same scaffold | S13 |
| Combustion analysis data for the target compounds            | S14 |
| References                                                   | S14 |

## General methods and materials

$^1\text{H}$ -NMR spectra were recorded in  $\text{CDCl}_3$  at ambient temperature unless otherwise noted, at 400 or 500 MHz, with TMS as an internal standard.  $^{13}\text{C}$  NMR spectra were recorded in  $\text{CDCl}_3$  at ambient temperature unless otherwise noted, at 100 or 125 MHz. Silica gel column chromatography was performed with silica gel 60 N (spherical, neutral, 63-210  $\mu\text{m}$ , Kanto Chemical Co., Inc.). Flash column chromatography was performed with silica gel 60 N (spherical, neutral, 40-50  $\mu\text{m}$ , Kanto Chemical Co., Inc.). Celite 545 was purchased from Kanto Chemical Co., Inc.  $\text{Pd}(\text{OH})_2/\text{C}$  was purchased from TCI. Combustion analysis was performed to confirm  $\geq 95\%$  sample purity (within  $\pm 0.4\%$  of the calculated value).

## Synthetic procedures for 5-8

### Scheme S1. Synthesis of amine-type targets 5-8<sup>a</sup>

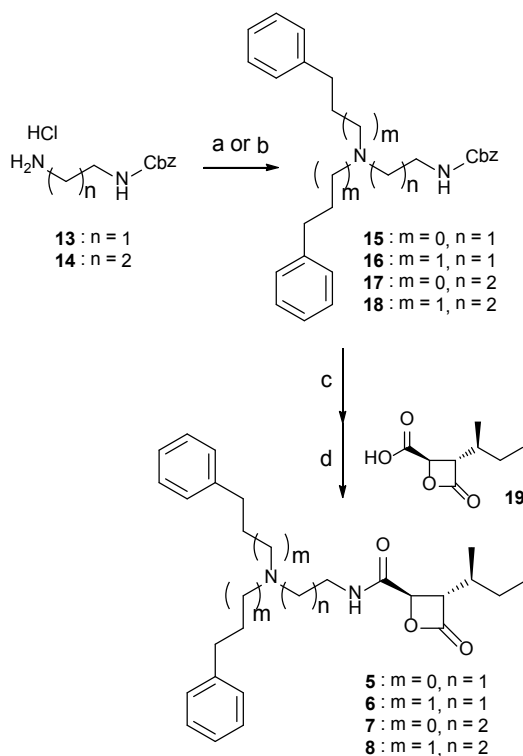

<sup>a</sup>Reagents and conditions: (a) phenylacetaldehyde,  $\text{NaBH}_3\text{CN}$ , MeOH, 96% for **15**, 86% for **17**; (b) benzylacetaldehyde,  $\text{NaBH}_3\text{CN}$ , MeOH, quant. for **16**, 90% for **18**; (c)  $\text{H}_2$ ,  $\text{Pd}(\text{OH})_2/\text{C}$ , MeOH; (d) **19**,  $\text{PivCl}$ ,  $\text{Et}_3\text{N}$ ,  $\text{CH}_2\text{Cl}_2$ , 0  $^\circ\text{C}$  to rt, yields were as follows (2 steps), 90% for **5**, quant. for **6**, 83% for **7**, 67% for **8**.

### General procedure for the preparation of 15-18

To a solution of the hydrochloride salt of a primary amine (1.0 equiv) in MeOH (0.1 M) was added aldehyde (5.0 equiv). After 30 min at rt,  $\text{NaBH}_3\text{CN}$  (4.5 equiv) was added and the resulting mixture was stirred for 28 h. The reaction mixture was concentrated *in vacuo* and the residue was dissolved in  $\text{CHCl}_3$ , washed with sat.  $\text{NaHCO}_3$ , dried over  $\text{Na}_2\text{SO}_4$  and the solvent was removed under reduced pressure. The crude product was purified by silica gel column chromatography to yield the corresponding tertiary amine.

benzyl (2-(diphenethylamino)ethyl)carbamate **15**

Amine **15** (860.2 mg, 2.14 mmol, 96%) was obtained as a colorless oil by the reaction of amine **13** (515 mg, 2.23 mmol) and phenylacetaldehyde. Purification was conducted by silica gel column chromatography (*n*-hexane/ AcOEt 10:3-3:1). <sup>1</sup>H-NMR (400 MHz, CDCl<sub>3</sub>) δ 7.43-7.02 (m, 15 H, aromatic), 5.06 (br, 2H, Cbz CH<sub>2</sub>), 4.82 (br, 1H, carbamate NH), 3.10 (td, *J* = 11.2, 5.4 Hz, 2H, CH<sub>2</sub>NH), 2.78-2.63 (m, 8H, benzyl CH<sub>2</sub> and BnCH<sub>2</sub>), 2.58 (t, *J* = 5.4 Hz, 2H, CH<sub>2</sub>CH<sub>2</sub>NH); <sup>13</sup>C-NMR (100 MHz, CDCl<sub>3</sub>) δ 156.3, 140.4, 136.7, 128.7, 128.4, 128.4, 128.0, 127.9, 126.0, 66.4, 55.5, 52.6, 38.4, 33.6; LRMS (ESI) *m/z* 403.24 [(M+H)<sup>+</sup>]; HRMS (ESI) calcd for C<sub>26</sub>H<sub>31</sub>N<sub>2</sub>O<sub>2</sub>: 403.2380 [(M+Na)<sup>+</sup>], found: 403.2379.

benzyl (2-(bis(3-phenylpropyl)amino)ethyl)carbamate **16**

Amine **16** (258 mg, 0.599 mmol, quant.) was obtained as a colorless oil by the reaction of amine **13** (135 mg, 0.587 mmol) and 3-phenylpropionaldehyde. Purification was conducted by silica gel column chromatography (*n*-hexane/ AcOEt 3:2). <sup>1</sup>H-NMR (400 MHz, CDCl<sub>3</sub>) δ 7.39-7.09 (m, 15H, aromatic), 5.25 (br, 1H, carbamate NH), 5.08 (br, 2H, Cbz CH<sub>2</sub>), 3.20 (dd, *J* = 11.3, 5.4 Hz, 2H, CH<sub>2</sub>NH), 2.56 (t, *J* = 7.7 Hz, 4H, benzyl CH<sub>2</sub> or BnCH<sub>2</sub>CH<sub>2</sub>N), 2.51 (t, *J* = 5.9 Hz, 2H, CH<sub>2</sub>CH<sub>2</sub>NH), 2.44 (t, *J* = 7.2 Hz, 4H, BnCH<sub>2</sub>CH<sub>2</sub>N), 1.71 (tt, *J* = 7.7, 7.2 Hz, 4H, BnCH<sub>2</sub>); <sup>13</sup>C-NMR (100 MHz, CDCl<sub>3</sub>) δ 156.3, 142.0, 136.6, 128.4, 128.3, 128.0, 128.0, 125.7, 66.5, 53.2, 53.0, 38.5, 33.6, 28.7; LRMS (ESI) *m/z* 431.27 [(M+H)<sup>+</sup>]; HRMS (ESI) calcd for C<sub>28</sub>H<sub>35</sub>N<sub>2</sub>O<sub>2</sub>: 431.2693 [(M+H)<sup>+</sup>], found: 431.2689.

benzyl (3-(diphenethylamino)propyl)carbamate **17**

Amine **17** (762 mg, 1.83 mmol, 86%) was obtained as a colorless oil by the reaction of amine **14** (518 mg, 2.12 mmol) and phenylacetaldehyde. Purification was conducted by silica gel column chromatography (*n*-hexane/ AcOEt 3:2). <sup>1</sup>H-NMR (400 MHz, CDCl<sub>3</sub>) δ 7.39-7.07 (m, 15H, aromatic), 5.64 (br, 1H, carbamate NH), 5.08 (s, 2H, Cbz CH<sub>2</sub>), 3.19 (td, *J* = 5.9, 5.9 Hz, 2H, CH<sub>2</sub>NH), 2.79-2.64 (m, 8H, benzyl CH<sub>2</sub> and BnCH<sub>2</sub>), 2.58 (t, *J* = 6.3 Hz, 2H, CH<sub>2</sub>CH<sub>2</sub>CH<sub>2</sub>NH), 1.61 (tt, *J* = 6.3, 5.9 Hz, 2H, CH<sub>2</sub>CH<sub>2</sub>NH); <sup>13</sup>C-NMR (100 MHz, CDCl<sub>3</sub>) δ 156.3, 140.3, 136.8, 128.7, 128.4, 128.3, 128.0, 127.9, 126.0, 66.3, 55.7, 52.5, 40.4, 33.5, 26.6; LRMS (ESI) *m/z* 417.25 [(M+H)<sup>+</sup>]; HRMS (ESI) calcd for C<sub>27</sub>H<sub>33</sub>N<sub>2</sub>O<sub>2</sub>: 417.2537 [(M+H)<sup>+</sup>], found: 417.2533.

benzyl (3-(bis(3-phenylpropyl)amino)propyl)carbamate **18**

Amine **18** (819 mg, 1.84 mmol, 90%) was obtained as a colorless oil by the reaction of amine **14** (503 mg, 2.06 mmol) and 3-phenylpropionaldehyde. Purification was conducted by silica gel column chromatography (*n*-hexane/ AcOEt 5:1-2:1-1:2). <sup>1</sup>H-NMR (500 MHz, CDCl<sub>3</sub>) δ 7.37-7.09 (m, 15H, aromatic), 6.16 (br, 1H, carbamate NH), 5.07 (s, 2H, Cbz CH<sub>2</sub>), 3.27 (dd, *J* = 11.5, 5.7 Hz, 2H, CH<sub>2</sub>NH), 2.58 (t, *J* = 7.4 Hz, 4H, benzyl CH<sub>2</sub> or BnCH<sub>2</sub>CH<sub>2</sub>N), 2.47 (t, *J* = 6.3 Hz, 2H, CH<sub>2</sub>CH<sub>2</sub>CH<sub>2</sub>NH), 2.41 (t, *J* = 7.4 Hz, 4H, benzyl CH<sub>2</sub> or BnCH<sub>2</sub>CH<sub>2</sub>N), 1.73 (tt, *J* = 7.4, 7.4 Hz, 4H, BnCH<sub>2</sub>), 1.65-1.53 (m, 2H, CH<sub>2</sub>CH<sub>2</sub>NH); <sup>13</sup>C-NMR (125 MHz, CDCl<sub>3</sub>) δ 156.3, 142.0, 136.8, 128.3, 128.2, 127.9, 127.8, 125.7, 66.3, 53.4, 53.3, 40.9, 33.6, 28.5, 26.1; LRMS (ESI) *m/z* 445.28 [(M+H)<sup>+</sup>]; HRMS (ESI) calcd for C<sub>29</sub>H<sub>37</sub>N<sub>2</sub>O<sub>2</sub>: 445.2850 [(M+H)<sup>+</sup>], found: 445.2847.

General procedure for the preparation of target compounds **5-8**

To a solution of the Cbz-protected amine (1.0 equiv) in MeOH (0.1 M) was added Pd(OH)<sub>2</sub>/C (50% w/w of the substrate). The flask was purged with hydrogen and the reaction mixture was stirred under an atmosphere of hydrogen (balloon pressure) for 6 h. The reaction mixture was filtered through a Celite pad and the filtrate was concentrated *in vacuo* to give the corresponding primary amine.

To a solution of carboxylic acid **19**<sup>1</sup> (2.5 equiv) in DCM (0.1 M) was added triethylamine (2.5 equiv) and PivCl (2.3 equiv) at 0 °C. After 30 min at 0 °C, the reaction mixture was used as a solution of the corresponding acid anhydride in DCM.

To a solution of the aforementioned amine in DCM (0.1 M) was added triethylamine (1.5 equiv) and a solution of the acid anhydride in DCM at 0 °C. After 5 min at 0 °C, the reaction mixture was warmed to rt and stirred for 18 h. The reaction mixture was diluted with DCM, washed with sat. NaHCO<sub>3</sub>, dried over Na<sub>2</sub>SO<sub>4</sub> and the solvent was removed under reduced pressure. The crude product was purified by silica gel column chromatography to yield the corresponding target compound.

#### Target compound 5

The crude product was purified by silica gel column chromatography (*n*-hexane/ AcOEt 2:1) to yield target compound **5** (77.8 mg, 0.184 mmol, 2 steps 90%) as a colorless oil. [ $\alpha$ ]<sub>D</sub><sup>25</sup> -3.30 (*c* 1.31, CH<sub>2</sub>Cl<sub>2</sub>)  $\delta$  7.34-7.11 (m, 10H, aromatic), 6.46 (br, 1H, amide NH), 4.47 (d, *J* = 4.6 Hz, 1H, NHCOCH<sub>2</sub>), 3.52 (dd, *J* = 8.0, 4.6 Hz, 1H, OCOCH), 3.30-3.20 (m, 1H, CH<sub>2</sub>NH), 3.18-3.08 (m, 1H, CH<sub>2</sub>NH), 2.77 (t, *J* = 7.4 Hz, 4H, benzyl CH<sub>2</sub> or BnCH<sub>2</sub>), 2.70 (t, *J* = 7.4 Hz, 4H, benzyl CH<sub>2</sub> or BnCH<sub>2</sub>), 2.62 (t, *J* = 5.7 Hz, 2H, CH<sub>2</sub>CH<sub>2</sub>NH), 2.02-1.91 (m, 1H, *sec*-butyl CH), 1.71-1.60 (m, 1H, *sec*-butyl CH<sub>2</sub>), 1.37-1.23 (m, 1H, *sec*-butyl CH<sub>2</sub>), 1.06 (d, *J* = 6.9 Hz, 3H, *sec*-butyl CH<sub>3</sub>), 0.94 (dd, *J* = 7.4, 7.4 Hz, 3H, *sec*-butyl CH<sub>3</sub>); <sup>13</sup>C-NMR (125 MHz, CDCl<sub>3</sub>)  $\delta$  169.3, 167.6, 140.2, 128.7, 128.5, 126.1, 70.6, 62.6, 55.7, 52.4, 36.8, 33.8, 33.7, 26.6, 16.3, 11.0; LRMS (ESI) *m/z* 423.26 [(M+H)<sup>+</sup>]; HRMS (ESI) calcd for C<sub>26</sub>H<sub>35</sub>N<sub>2</sub>O<sub>3</sub>: 423.2642 [(M+H)<sup>+</sup>], found: 423.2642.

#### Target compound 6

The crude product was purified by silica gel column chromatography (*n*-hexane/ AcOEt 3:2) to yield target compound **6** (59.6 mg, 0.132 mmol, 2 steps quant.) as a colorless oil. [ $\alpha$ ]<sub>D</sub><sup>25</sup> -5.95 (*c* 0.46, CH<sub>2</sub>Cl<sub>2</sub>); <sup>1</sup>H-NMR (500 MHz, CDCl<sub>3</sub>)  $\delta$  7.31-7.25 (m, 4H, aromatic), 7.21-7.14 (m, 6H, aromatic), 6.94 (br, 1H, amide NH), 4.57 (d, *J* = 4.6 Hz, 1H, NHCOCH<sub>2</sub>), 3.55 (dd, *J* = 7.4, 4.6 Hz, 1H, OCOCH), 3.37-3.21 (m, 2H, CH<sub>2</sub>NH), 2.60 (t, *J* = 7.4 Hz, 4H, benzyl CH<sub>2</sub> or BnCH<sub>2</sub>CH<sub>2</sub>N), 2.56 (dd, *J* = 6.3, 5.7 Hz, 2H, CH<sub>2</sub>CH<sub>2</sub>NH), 2.47 (t, *J* = 7.4 Hz, 4H, benzyl CH<sub>2</sub> or BnCH<sub>2</sub>CH<sub>2</sub>N), 2.02-1.91 (m, 1H, *sec*-butyl CH), 1.73 (tt, *J* = 7.4, 7.4 Hz, 4H, BnCH<sub>2</sub>), 1.70-1.59 (m, 1H, *sec*-butyl CH<sub>2</sub>), 1.35-1.25 (m, 1H, *sec*-butyl CH<sub>2</sub>), 1.06 (d, *J* = 6.9 Hz, 3H, *sec*-butyl CH<sub>3</sub>), 0.93 (dd, *J* = 7.4, 7.4 Hz, 3H, *sec*-butyl CH<sub>3</sub>); <sup>13</sup>C-NMR (125 MHz, CDCl<sub>3</sub>)  $\delta$  169.2, 167.8, 141.9, 128.3, 128.3, 125.8, 70.7, 62.9, 53.2, 52.3, 36.7, 33.8, 33.5, 28.6, 26.6, 16.3, 11.0; LRMS (ESI) *m/z* 451.30 [(M+H)<sup>+</sup>]; HRMS (ESI) calcd for C<sub>28</sub>H<sub>39</sub>N<sub>2</sub>O<sub>3</sub>: 451.2955 [(M+H)<sup>+</sup>], found: 451.2957.

#### Target compound 7

The crude product was purified by silica gel column chromatography (*n*-hexane/ AcOEt 3:2) to yield target compound **7** (51.8 mg, 0.119 mmol, 2 steps 83%) as a colorless oil. [ $\alpha$ ]<sub>D</sub><sup>25</sup> -5.00 (*c* 0.56, CH<sub>2</sub>Cl<sub>2</sub>); <sup>1</sup>H-NMR (500 MHz, CDCl<sub>3</sub>)  $\delta$  8.00 (br, 1H, amide NH), 7.33-7.15 (m, 10H, aromatic), 4.53 (d, *J* = 4.6 Hz, 1H, NHCOCH<sub>2</sub>), 3.55 (dd, *J* = 7.4,

4.6 Hz, 1H, OCOCH), 3.45-3.35 (m, 1H, CH<sub>2</sub>NH), 3.30-3.21 (m, 1H, CH<sub>2</sub>NH), 2.85-2.73 (m, 8H, benzyl CH<sub>2</sub> and BnCH<sub>2</sub>), 2.73-2.62 (m, 2H, CH<sub>2</sub>CH<sub>2</sub>CH<sub>2</sub>NH), 2.02-1.92 (m, 1H, *sec*-butyl CH), 1.72-1.60 (m, 3H, CH<sub>2</sub>CH<sub>2</sub>NH and *sec*-butyl CH<sub>2</sub> (1H)), 1.37-1.24 (m, 1H, *sec*-butyl CH<sub>2</sub>), 1.07 (d, *J* = 6.3 Hz, 3H, *sec*-butyl CH<sub>3</sub>), 0.94 (dd, *J* = 7.4, 7.4 Hz, 3H, *sec*-butyl CH<sub>3</sub>); <sup>13</sup>C-NMR (125 MHz, CDCl<sub>3</sub>) δ 169.4, 167.8, 140.2, 128.7, 128.4, 126.1, 70.7, 62.8, 55.7, 53.0, 39.6, 33.8, 33.1, 26.6, 25.4, 16.3, 11.0; LRMS (ESI) *m/z* 437.28 [(M+H)<sup>+</sup>]; HRMS (ESI) calcd for C<sub>27</sub>H<sub>37</sub>N<sub>2</sub>O<sub>3</sub>: 437.2799 [(M+H)<sup>+</sup>], found: 437.2800.

### Target compound 8

The crude product was purified by silica gel column chromatography (*n*-hexane/ AcOEt 1:2) to yield target compound **8** (47.9 mg, 0.103 mmol, 2 steps 67%) as a colorless oil. [α]<sub>D</sub><sup>25</sup> -7.17 (*c* 0.51, CH<sub>2</sub>Cl<sub>2</sub>); <sup>1</sup>H-NMR (500 MHz, CDCl<sub>3</sub>) δ 8.25 (br, 1H, amide NH), 7.32-7.14 (m, 10H, aromatic), 4.54 (d, *J* = 4.6 Hz, 1H, NHCOCH), 3.52 (dd, *J* = 8.0, 4.6 Hz, 1H, OCOCH), 3.48-3.38 (m, 1H, CH<sub>2</sub>NH), 3.38-3.28 (m, 1H, CH<sub>2</sub>NH), 2.64-2.39 (m, 10H, benzyl CH<sub>2</sub>, BnCH<sub>2</sub>CH<sub>2</sub> and CH<sub>2</sub>CH<sub>2</sub>CH<sub>2</sub>NH), 2.02-1.91 (m, 1H, *sec*-butyl CH), 1.77 (tt, *J* = 8.0, 7.4 Hz, 4H, BnCH<sub>2</sub>), 1.74-1.54 (m, 3H, CH<sub>2</sub>CH<sub>2</sub>NH and *sec*-butyl CH<sub>2</sub> (1H)), 1.37-1.21 (m, 1H, *sec*-butyl CH<sub>2</sub>), 1.07 (d, *J* = 6.9 Hz, 3H, *sec*-butyl CH<sub>3</sub>), 0.94 (dd, *J* = 7.4, 7.4 Hz, 3H, *sec*-butyl CH<sub>3</sub>); <sup>13</sup>C-NMR (125 MHz, CDCl<sub>3</sub>) δ 169.4, 167.8, 142.0, 128.3, 125.8, 70.8, 62.8, 53.5, 39.9, 33.8, 33.7, 28.1, 26.6, 25.1, 16.3, 11.0; LRMS (ESI) *m/z* 465.31 [(M+H)<sup>+</sup>]; HRMS (ESI) calcd for C<sub>29</sub>H<sub>41</sub>N<sub>2</sub>O<sub>3</sub>: 465.3112 [(M+H)<sup>+</sup>], found: 465.3115.

### Synthetic procedures for 9 and 11

**Scheme S2.** Synthesis of ether-type (acetal) targets **9** and **11**<sup>a</sup>

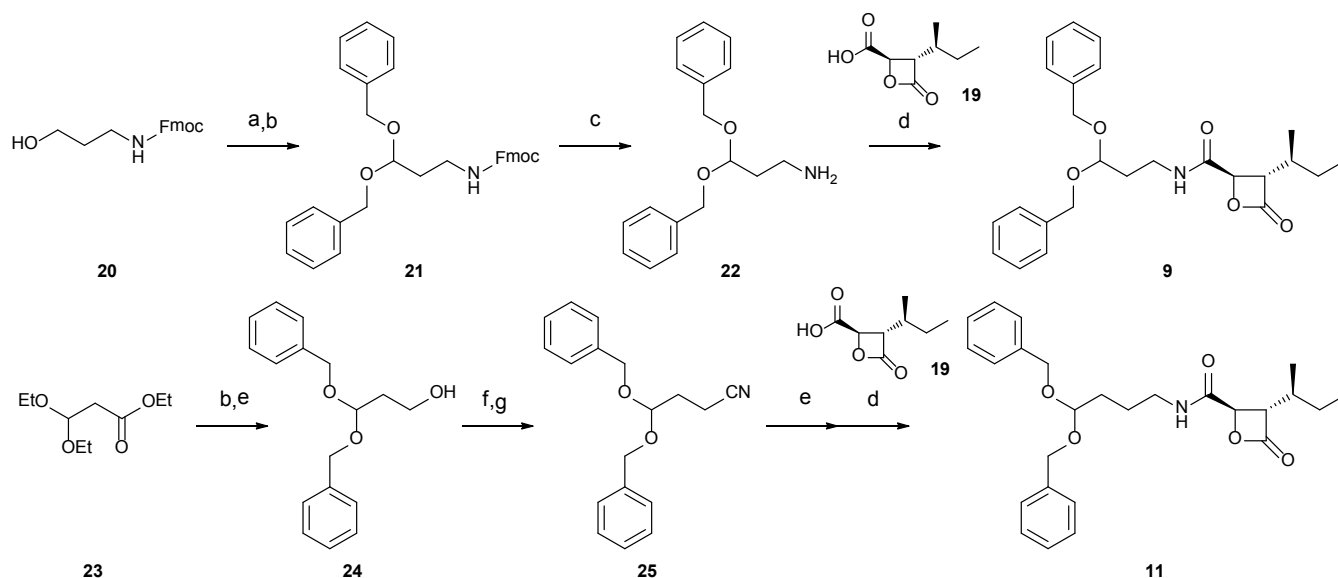

<sup>a</sup>Reagents and conditions: (a) Dess-Martin periodinane, CH<sub>2</sub>Cl<sub>2</sub>; (b) BnOH, *p*-TsOH, benzene, reflux, 2 steps 57% for **21**; (c) K<sub>2</sub>CO<sub>3</sub>, MeOH, 97%; (d) **19**, PivCl, Et<sub>3</sub>N, CH<sub>2</sub>Cl<sub>2</sub>, 0 °C to rt, 95% for **9**, 2 steps quant. for **11**; (e) LiAlH<sub>4</sub>, Et<sub>2</sub>O, 0 °C to rt, 2 steps 60% for **24**; (f) MsCl, Et<sub>3</sub>N, CH<sub>2</sub>Cl<sub>2</sub>, 0 °C; (g) NaCN, DMSO, 60 °C, 2 steps 92%.

### (9H-fluoren-9-yl)methyl (3,3-bis(benzyloxy)propyl)carbamate 21

To a solution of carbamate **20** (594 mg, 2.00 mmol) in DCM (20 ml) was added DMP (1.27 g, 3.00 mmol, 1.5 equiv). After 30 min at rt, the reaction was quenched with a solution of sat. Na<sub>2</sub>S<sub>2</sub>O<sub>3</sub> and sat. NaHCO<sub>3</sub> (1:3), extracted with CHCl<sub>3</sub>, the organic layer was washed with water, dried over Na<sub>2</sub>SO<sub>4</sub> and the solvent was removed under reduced pressure to yield the corresponding aldehyde as a white solid.

To a solution of the solid in benzene (20 ml) was added BnOH (827 µl, 7.99 mmol, 4.0 equiv) and *p*-TsOH·H<sub>2</sub>O (3.80 mg, 0.0200 mmol, 0.01 equiv) and the resulting mixture was refluxed in a flask equipped with a Dean-Stark trap. After 19 h, the reaction mixture was concentrated *in vacuo* and the residue was dissolved in CHCl<sub>3</sub>, washed with sat. NaHCO<sub>3</sub>, dried over Na<sub>2</sub>SO<sub>4</sub> and the solvent was removed under reduced pressure. The crude product was purified by flash column chromatography (*n*-hexane/ AcOEt 15:1-5:1) to yield benzyl acetal **21** (560 mg, 1.13 mmol, 2 steps 57%) as a white solid. mp 93-94 °C; <sup>1</sup>H-NMR (400 MHz, CDCl<sub>3</sub>, 328 K) δ 7.73 (d, *J* = 7.6 Hz, 2H, aromatic), 7.54 (d, *J* = 7.2 Hz, 2H, aromatic), 7.40-7.21 (m, 14H, aromatic), 5.02 (br, 1H, carbamate NH), 4.78 (t, *J* = 4.9 Hz, 1H, OCHO), 4.67 (d, *J* = 11.7 Hz, 2H, benzyl CH<sub>2</sub>), 4.56 (d, *J* = 11.7 Hz, 2H, benzyl CH<sub>2</sub>), 4.36 (d, *J* = 6.7 Hz, 2H, Fmoc CH<sub>2</sub>), 4.17 (t, *J* = 6.7 Hz, 1H, Fmoc CH), 3.31 (br, 2H, CH<sub>2</sub>NH), 1.94 (br, 2H, CH<sub>2</sub>CH<sub>2</sub>NH); <sup>13</sup>C-NMR (100 MHz, CDCl<sub>3</sub>) δ 156.3, 143.9, 141.2, 137.7, 128.5, 127.8, 127.6, 127.0, 125.0, 119.9, 101.0, 67.9, 66.5, 47.2, 37.0, 33.1; LRMS (ESI) *m/z* 516.22 [(M+Na)<sup>+</sup>]; HRMS (ESI) calcd for C<sub>32</sub>H<sub>31</sub>NO<sub>4</sub>Na: 516.2145 [(M+Na)<sup>+</sup>], found: 516.2142.

### 3,3-bis(benzyloxy)propan-1-amine 22

To a solution of benzyl acetal **21** (117 mg, 0.236 mmol) in MeOH (25 ml) was added K<sub>2</sub>CO<sub>3</sub> (326 mg, 2.36 mmol, 10 equiv). After 23 h at rt, the reaction mixture was concentrated *in vacuo*. The crude product was purified by NH-silica gel column chromatography (*n*-hexane/ CHCl<sub>3</sub>/ MeOH 1:0:0-0:4:1) to yield amine **22** (62.1 mg, 0.229 mmol, 97%) as a colorless oil. <sup>1</sup>H-NMR (400 MHz, CDCl<sub>3</sub>) δ 7.44-7.25 (m, 10H, aromatic), 4.85 (t, *J* = 5.8 Hz, 1H, OCHO), 4.67 (d, *J* = 11.7 Hz, 2H, benzyl CH<sub>2</sub>), 4.58 (d, *J* = 11.7 Hz, 2H, benzyl CH<sub>2</sub>), 2.82 (t, *J* = 6.7 Hz, 2H, CH<sub>2</sub>NH), 1.92 (td, *J* = 6.7, 5.8 Hz, 2H, CH<sub>2</sub>CH<sub>2</sub>NH<sub>2</sub>), 1.44 (br, 2H, NH<sub>2</sub>); <sup>13</sup>C-NMR (100 MHz, CDCl<sub>3</sub>) δ 138.1, 128.5, 128.4, 127.9, 127.8, 127.8, 127.7, 127.6, 100.8, 67.4, 38.1, 37.0; LRMS (APCI) *m/z* 272.16 [(M+H)<sup>+</sup>]; HRMS (APCI) calcd for C<sub>17</sub>H<sub>22</sub>NO<sub>2</sub>: 272.1645 [(M+H)<sup>+</sup>], found: 272.1648.

### Target compound 9

To a solution of carboxylic acid **19**<sup>1</sup> (54.9 mg, 0.319 mmol, 2.5 equiv) in DCM (3.0 ml) was added triethylamine (44.4 µl, 0.319 mmol, 2.5 equiv) and PivCl (36.1 µl, 0.293 mmol, 2.3 equiv) at 0 °C. After 30 min at 0 °C, the reaction mixture was used as a solution of the corresponding acid anhydride in DCM.

To a solution of amine **22** (34.6 mg, 0.128 mmol, 1.0 equiv) in DCM (1.5 ml) was added triethylamine (26.6 µl, 0.191 mmol, 1.5 equiv) and a solution of the acid anhydride in DCM at 0 °C. After 5 min at 0 °C, the reaction mixture was warmed to rt and stirred for 19 h. The reaction mixture was diluted with AcOEt, washed with 1M HCl, sat. NaHCO<sub>3</sub> and brine, dried over Na<sub>2</sub>SO<sub>4</sub> and the solvent was removed under reduced pressure. The crude product was purified by silica gel column chromatography (*n*-hexane/ AcOEt 3:1) to yield target compound **9** (51.7 mg, 0.122 mmol, 95%) as a colorless oil. [α]<sub>D</sub><sup>23</sup> 4.44 (*c* 0.94, CHCl<sub>3</sub>); <sup>1</sup>H-NMR (400 MHz, CDCl<sub>3</sub>) δ 7.42-7.27 (m, 10H, aromatic), 6.84 (br, 1H, amide NH), 4.80 (dd, *J* = 5.4, 4.9 Hz, 1H, OCHO), 4.70 (d, *J* = 11.7 Hz, 1H, benzyl CH<sub>2</sub>), 4.69 (d, *J* = 11.7 Hz, 1H, benzyl CH<sub>2</sub>), 4.57 (d, *J* = 11.7 Hz, 1H, benzyl CH<sub>2</sub>), 4.56 (d, *J* = 11.7 Hz, 1H, benzyl CH<sub>2</sub>), 4.51 (d, *J* = 4.5 Hz, 1H, NHCOCH), 3.53 (dd, *J* = 7.6, 4.5 Hz, 1H, OCOCH), 3.53-3.34 (m, 2H, CH<sub>2</sub>NH), 2.03-1.88 (m, 3H, CH<sub>2</sub>CH<sub>2</sub>NH

and *sec*-butyl CH), 1.72-1.58 (m, 1H, *sec*-butyl CH<sub>2</sub>), 1.38-1.21 (m, 1H, *sec*-butyl CH<sub>2</sub>), 1.05 (d, *J* = 6.7 Hz, 3H, *sec*-butyl CH<sub>3</sub>), 0.94 (dd, *J* = 7.6, 7.2 Hz, 3H, *sec*-butyl CH<sub>3</sub>); <sup>13</sup>C-NMR (100 MHz, CDCl<sub>3</sub>) δ 169.1, 167.7, 137.5, 128.6, 127.9, 127.9, 100.9, 70.6, 68.3, 68.2, 62.8, 35.0, 33.8, 32.6, 26.6, 16.3, 11.0; LRMS (ESI) *m/z* 448.21 [(M+Na)<sup>+</sup>]; HRMS (ESI) calcd for C<sub>25</sub>H<sub>31</sub>NO<sub>5</sub>Na: 448.2094 [(M+Na)<sup>+</sup>], found: 448.2098.

### 3,3-bis(benzyloxy)propan-1-ol **24**

To a solution of ethyl 3,3-diethoxypropanoate **23** (118 μl, 0.607 mmol) in benzene (10 ml) was added BnOH (251 μl, 2.43 mmol, 4.0 equiv) and *p*-TsOH·H<sub>2</sub>O (1.15 mg, 0.00607 mmol, 0.01 equiv). The reaction mixture was refluxed in a flask equipped with a Dean-Stark trap for 30 h. The reaction mixture was diluted with AcOEt, washed with sat. NaHCO<sub>3</sub> and brine, dried over Na<sub>2</sub>SO<sub>4</sub> and the solvent was removed under reduced pressure. The crude product was purified by silica gel column chromatography (*n*-hexane/ AcOEt 10:1) to give the corresponding benzyl acetal as a colorless liquid.

To a solution of LiAlH<sub>4</sub> (69.1 mg, 1.82 mmol, 3.0 equiv) in Et<sub>2</sub>O (2.0 ml) was added the aforementioned liquid in Et<sub>2</sub>O (1.0 ml) *via cannula* at 0 °C. After 5 min at 0 °C, the reaction mixture was warmed to rt and stirred for 2 h. To the reaction mixture was added water (69.1 μl), 15% NaOH (69.1 μl) and water (207 μl) at 0 °C and the resulting mixture was vigorously stirred at rt for 1 h. The mixture was filtered through a Celite pad and the filtrate was concentrated *in vacuo*. The crude product was purified by silica gel column chromatography (*n*-hexane/ AcOEt 3:1) to yield alcohol **24** (99.2 mg, 0.364 mmol, 2 steps 60%) as a colorless liquid. <sup>1</sup>H-NMR (400 MHz, CDCl<sub>3</sub>) δ 7.40-7.26 (m, 10H, aromatic), 4.92 (t, *J* = 5.4 Hz, 1H, OCHO), 4.71 (d, *J* = 11.8 Hz, 2H, benzyl CH<sub>2</sub>), 4.59 (d, *J* = 11.8 Hz, 2H, benzyl CH<sub>2</sub>), 3.75 (t, *J* = 5.4 Hz, 2H, CH<sub>2</sub>OH), 2.36 (br, 1H, OH), 2.01 (td, *J* = 5.4, 5.4 Hz, 2H, CH<sub>2</sub>CH<sub>2</sub>OH); <sup>13</sup>C-NMR (100 MHz, CDCl<sub>3</sub>) δ 137.7, 128.5, 127.8, 101.4, 68.0, 59.0, 35.6; LRMS (ESI) *m/z* 295.13 [(M+Na)<sup>+</sup>]; HRMS (ESI) calcd for C<sub>17</sub>H<sub>20</sub>O<sub>3</sub>Na: 295.1305 [(M+Na)<sup>+</sup>], found: 295.1305. <sup>1</sup>H-NMR and <sup>13</sup>C-NMR are in agreement with that reported by Colson.<sup>2</sup>

### 4,4-bis(benzyloxy)butanenitrile **25**

To a solution of alcohol **24** (99.2 mg, 0.364 mmol) in DCM (5.0 ml) was added triethylamine (76.1 μl, 0.547 mmol, 1.5 equiv) and MsCl (33.8 μl, 0.437 mmol, 1.2 equiv) at 0 °C. After 30 min at 0 °C, the reaction mixture was diluted with AcOEt, washed with water and brine, dried over Na<sub>2</sub>SO<sub>4</sub> and the solvent was removed under reduced pressure to give the corresponding mesylated product as a colorless oil.

To a solution of the oil in DMSO (410 μl) was added NaCN (107 mg, 2.19 mmol, 6.0 equiv). After 15 h at 60 °C, the reaction mixture was diluted with AcOEt, washed with water and brine, dried over Na<sub>2</sub>SO<sub>4</sub> and the solvent was removed under reduced pressure. The crude product was purified by silica gel column chromatography (*n*-hexane/ AcOEt 10:1) to yield nitrile **25** (97.1 mg, 0.345 mmol, 2 steps 95%) as a colorless oil. <sup>1</sup>H-NMR (400 MHz, CDCl<sub>3</sub>) δ 7.41-7.26 (m, 10H, aromatic), 4.81 (t, *J* = 5.4 Hz, 1H, OCHO), 4.69 (d, *J* = 11.7 Hz, 2H, benzyl CH<sub>2</sub>), 4.56 (d, *J* = 11.7 Hz, 2H, benzyl CH<sub>2</sub>), 2.42 (t, *J* = 7.2 Hz, 2H, CH<sub>2</sub>CN), 2.04 (m, 2H, CH<sub>2</sub>CH<sub>2</sub>CN); <sup>13</sup>C-NMR (100 MHz, CDCl<sub>3</sub>) δ 137.4, 128.5, 127.9, 127.8, 119.3, 100.0, 68.4, 29.4, 12.4; LRMS (ESI) *m/z* 304.13 [(M+Na)<sup>+</sup>]; HRMS (ESI) calcd for C<sub>18</sub>H<sub>19</sub>NO<sub>2</sub>Na: 304.1308 [(M+Na)<sup>+</sup>], found: 304.1307.



### Target compound **11**

To a solution of nitrile **25** (28.7 mg, 0.102 mmol) in Et<sub>2</sub>O (1.0 ml) was added LiAlH<sub>4</sub> (15.5 mg, 0.408 mmol, 4.0 equiv) at 0 °C. After 5 min at 0 °C, the reaction mixture was warmed to rt and stirred for 12 h. To the reaction mixture was added water (28.7 µl), 15% NaOH (28.7 µl) and water (86.1 µl) at 0 °C and the resulting mixture was vigorously stirred at rt for 1 h. The mixture was filtered through a Celite pad and the filtrate was concentrated *in vacuo* to give the corresponding amine as a colorless oil.

To a solution of carboxylic acid **19**<sup>1</sup> (43.9 mg, 0.255 mmol, 2.5 equiv) in DCM (2.5 ml) was added triethylamine (35.5 µl, 0.255 mmol, 2.5 equiv) and PivCl (28.3 µl, 0.230 mmol, 2.3 equiv) at 0 °C. After 30 min at 0 °C, the reaction mixture was used as a solution of the corresponding acid anhydride in DCM.

To a solution of the aforementioned amine in DCM (1.0 ml) was added triethylamine (21.4 µl, 0.154 mmol, 1.5 equiv) and a solution of the acid anhydride in DCM at 0 °C. After 5 min at 0 °C, the reaction mixture was warmed to rt and stirred for 19 h. The reaction mixture was diluted with AcOEt, washed with 1 M HCl, sat. NaHCO<sub>3</sub> and brine, dried over Na<sub>2</sub>SO<sub>4</sub> and the solvent was removed under reduced pressure. The crude product was purified by silica gel column chromatography (*n*-hexane/ AcOEt 3:1) to yield target compound **11** (45.9 mg, 0.104 mmol, 2 steps quant.) as a colorless oil.  $[\alpha]_D^{24}$  12.22 (*c* 0.62, CHCl<sub>3</sub>); <sup>1</sup>H-NMR (500 MHz, CDCl<sub>3</sub>) δ 7.40-7.27 (m, 10H, aromatic), 6.52 (br, 1H, amide NH), 4.74 (t, *J* = 5.7 Hz, 1H, OCHO), 4.68 (d, *J* = 11.5 Hz, 1H, benzyl CH<sub>2</sub>), 4.67 (d, *J* = 11.5 Hz, 1H, benzyl CH<sub>2</sub>), 4.57 (d, *J* = 4.6 Hz, 1H, NHCOCH), 4.56 (d, *J* = 11.5 Hz, 2H, benzyl CH<sub>2</sub>), 3.55 (dd, *J* = 7.4, 4.6 Hz, 1H, OCOCH), 3.39-3.24 (m, 2H, CH<sub>2</sub>NH), 2.03-1.92 (m, 1H, *sec*-butyl CH), 1.82-1.73 (m, 2H, CH<sub>2</sub>CH<sub>2</sub>CH<sub>2</sub>NH), 1.71-1.59 (m, 3H, CH<sub>2</sub>CH<sub>2</sub>NH and *sec*-butyl CH<sub>2</sub> (1H)), 1.37-1.25 (m, 1H, *sec*-butyl CH<sub>2</sub>), 1.07 (d, *J* = 6.9 Hz, 3H, *sec*-butyl CH<sub>3</sub>), 0.94 (dd, *J* = 7.4, 7.4 Hz, 3H, *sec*-butyl CH<sub>3</sub>); <sup>13</sup>C-NMR (125 MHz, CDCl<sub>3</sub>) δ 169.2, 167.8, 137.9, 128.5, 127.8, 127.7, 101.5, 70.7, 67.7, 67.7, 62.9, 38.9, 33.8, 30.7, 26.6, 24.3, 16.3, 11.0; LRMS (ESI) *m/z* 462.23 [(M+Na)<sup>+</sup>]; HRMS (ESI) calcd for C<sub>26</sub>H<sub>33</sub>NO<sub>5</sub>Na: 462.2251 [(M+Na)<sup>+</sup>], found: 462.2253.

### Synthetic procedures for **10** and **12**



**Scheme S3.** Synthesis of ether-type targets **10** and **12**<sup>a</sup>

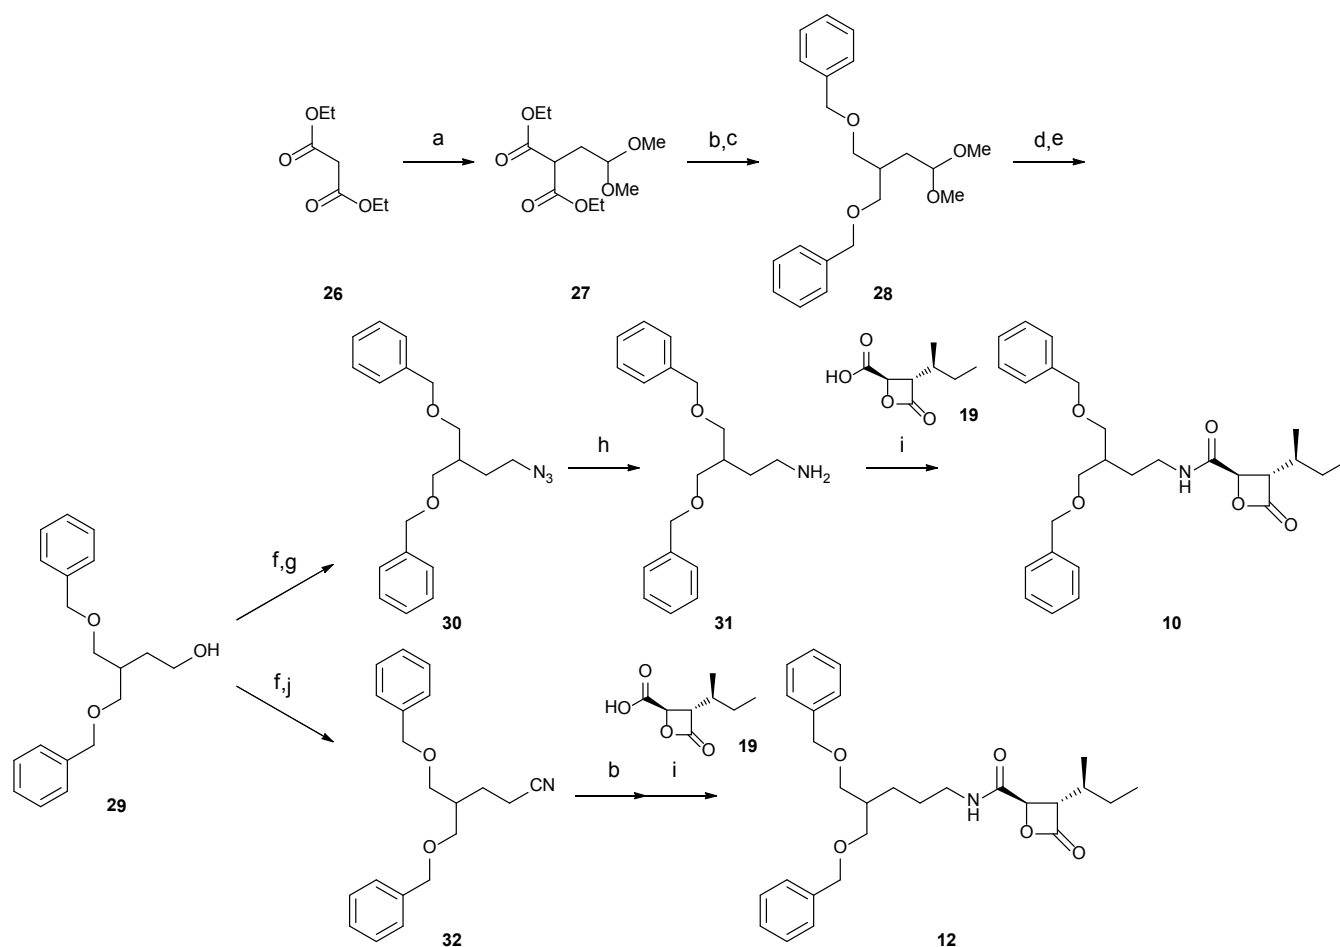

<sup>a</sup>Reagents and conditions: (a) bromoacetaldehyde diethyl acetal, NaOEt, EtOH, rt to reflux, 59% (b) LiAlH<sub>4</sub>, Et<sub>2</sub>O, 0 °C to rt; (c) NaH, BnBr, DMF, 0 °C, to rt, 2 steps 64%; (d) AcOH, H<sub>2</sub>O; (e) NaBH<sub>4</sub>, MeOH, 0 °C to rt, 2 steps 97%; (f) MsCl, Et<sub>3</sub>N, CH<sub>2</sub>Cl<sub>2</sub>, 0 °C; (g) NaN<sub>3</sub>, DMF, 70 °C, 2 steps 91%; (h) PPh<sub>3</sub>, H<sub>2</sub>O/THF, rt to reflux, quant.; (i) **19**, PivCl, Et<sub>3</sub>N, CH<sub>2</sub>Cl<sub>2</sub>, 0 °C to rt, quant. for **10**, 2 steps quant. for **12**; (j) NaCN, DMSO, 60 °C, 2 steps 98%.

#### diethyl 2-(2,2-dimethoxyethyl)malonate **27**

To a solution of sodium ethoxide (9.06 g, 133 mmol, 1.1 equiv) in EtOH (90 ml) was added diethyl malonate (18.3 ml, 121 mmol, 1.0 equiv). After 1 h at rt, bromoacetaldehyde dimethyl acetal (19.9 ml, 169 mmol, 1.4 equiv) was added and the resulting mixture was refluxed for 23 h. The reaction mixture was concentrated *in vacuo* and the residue was dissolved in DCM, washed with water, dried over Na<sub>2</sub>SO<sub>4</sub> and the solvent was removed under reduced pressure. The crude product was purified by flash column chromatography (*n*-hexane/ AcOEt 20:1) to yield compound **27** (17.8 g, 71.7 mmol, 59%) as a colorless liquid. <sup>1</sup>H-NMR (400 MHz, CDCl<sub>3</sub>) δ 4.43 (t, *J* = 5.8 Hz, 1H, OCHO), 4.21 (q, *J* = 7.2 Hz, 2H, OCH<sub>2</sub>), 4.20 (q, *J* = 7.2 Hz, 2H, OCH<sub>2</sub>), 3.49 (t, *J* = 7.2 Hz, 1H, COCHCO), 3.33 (s, 6H, OCH<sub>3</sub>), 2.22 (dd, *J* = 7.2, 5.8 Hz, 2H, CHCH<sub>2</sub>CH), 1.27 (t, *J* = 7.2 Hz, 6H, OCH<sub>2</sub>CH<sub>3</sub>); <sup>13</sup>C-NMR (100 MHz, CDCl<sub>3</sub>) δ 169.2, 102.5, 61.4, 53.4, 47.8, 31.7, 14.0; LRMS (ESI) *m/z* 271.11 [(M+Na)<sup>+</sup>]; HRMS (ESI) calcd for C<sub>11</sub>H<sub>20</sub>O<sub>6</sub>Na: 271.1152 [(M+Na)<sup>+</sup>], found: 271.1152. <sup>1</sup>H-NMR and <sup>13</sup>C-NMR are in agreement with that reported by Vignola.<sup>3</sup>

(((2-(2,2-dimethoxyethyl)propane-1,3-diyl)bis(oxy))bis(methylene))dibenzene 28

To a solution of  $\text{LiAlH}_4$  (3.64 g, 96.0 mmol, 3.0 equiv) in  $\text{Et}_2\text{O}$  (100 ml) was added compound **27** (7.94 g, 32.0 mmol) in  $\text{Et}_2\text{O}$  (45 ml) *via cannula* at 0 °C. After 5 min at 0 °C, the reaction mixture was warmed to rt and stirred for 2 h. To the reaction mixture was added water (3.64 ml), 15% NaOH (3.64 ml) and water (10.9 ml) at 0 °C, and the resulting mixture was vigorously stirred at rt for 1 h. The mixture was filtered through a Celite pad and the filtrate was concentrated *in vacuo* to give the corresponding diol as a colorless liquid.

To a solution of the liquid in DMF (40 ml) was added NaH (3.84 g, 95.9 mmol, 3.0 equiv, 60% oil suspension) at 0 °C. After 30 min at 0 °C, BnBr (9.49 ml, 79.9 mmol, 2.5 equiv) was added and the resulting mixture was warmed to rt. After 35 h at rt, the reaction was quenched with sat.  $\text{NH}_4\text{Cl}$  (70 ml) at 0 °C. The resulting mixture was extracted with AcOEt and the organic layer was washed with water and brine, dried over  $\text{Na}_2\text{SO}_4$  and the solvent was removed under reduced pressure. The crude product was purified by silica gel column chromatography (*n*-hexane/ AcOEt 10:1) to yield compound **28** (7.00 g, 20.3 mmol, 2 steps 64%) as a colorless oil.  $^1\text{H}$ -NMR (400 MHz,  $\text{CDCl}_3$ )  $\delta$  7.38-7.22 (m, 10H, aromatic), 4.49 (s, 4H, benzyl  $\text{CH}_2$ ), 4.49 (t,  $J$  = 6.3 Hz, 1H, OCHO), 3.55-3.45 (m, 4H,  $\text{OCH}_2\text{CH}$ ), 3.28 (s, 6H,  $\text{OCH}_3$ ), 2.15-2.03 (m, 1H,  $\text{CH}_2\text{CHCH}_2$ ), 1.71 (dd,  $J$  = 6.3, 6.3 Hz, 2H,  $\text{CHCH}_2\text{CH}$ );  $^{13}\text{C}$ -NMR (100 MHz,  $\text{CDCl}_3$ )  $\delta$  138.6, 128.3, 127.5, 127.4, 103.1, 73.0, 70.8, 52.6, 35.6, 31.6; LRMS (ESI)  $m/z$  367.19 [(M+Na) $^+$ ]; HRMS (ESI) calcd for  $\text{C}_{21}\text{H}_{28}\text{O}_4\text{Na}$ : 367.1880 [(M+Na) $^+$ ], found: 367.1877.

4-(benzyloxy)-3-((benzyloxy)methyl)butan-1-ol 29

To an emulsion of compound **28** (2.02 g, 5.87 mmol) in water (6.0 ml) was added acetic acid (6.0 ml). The resulting mixture was vigorously stirred for 5 h. The reaction mixture was diluted with AcOEt, washed with sat.  $\text{NaHCO}_3$  and brine, dried over  $\text{MgSO}_4$  and the solvent was removed under reduced pressure to give the corresponding aldehyde as a colorless oil.

To a solution of the oil in MeOH (60 ml) was added  $\text{NaBH}_4$  (111 mg, 2.94 mmol, 0.5 equiv) at 0 °C. After 5 min at 0 °C, the reaction mixture was warmed to rt. After 4 min at rt, acetone (60 ml) was added. After 1 h at rt, the resulting mixture was concentrated *in vacuo*. The residue was dissolved in AcOEt, washed with sat.  $\text{NaHCO}_3$  and brine, dried over  $\text{MgSO}_4$  and the solvent was removed under reduced pressure. The crude product was purified by silica gel column chromatography (*n*-hexane/ AcOEt 4:1) to yield alcohol **29** (1.71 g, 5.70 mmol, 2 steps 97%) as a colorless oil.  $^1\text{H}$ -NMR (400 MHz,  $\text{CDCl}_3$ )  $\delta$  7.38-7.25 (m, 10H, aromatic), 4.50 (s, 4H, benzyl  $\text{CH}_2$ ), 3.66 (t,  $J$  = 6.3 Hz, 2H,  $\text{CH}_2\text{OH}$ ), 3.53 (dd,  $J$  = 9.0, 6.3 Hz, 2H,  $\text{OCH}_2\text{CH}$ ), 3.44 (dd,  $J$  = 9.0, 5.8 Hz, 2H,  $\text{OCH}_2\text{CH}$ ), 3.01 (s, 1H, OH), 2.13 (ttt,  $J$  = 6.3, 6.3, 5.8 Hz, 1H,  $\text{CH}_2\text{CHCH}_2$ ), 1.67 (td,  $J$  = 6.3, 6.3 Hz, 2H,  $\text{CH}_2\text{CH}_2\text{OH}$ );  $^{13}\text{C}$ -NMR (100 MHz,  $\text{CDCl}_3$ )  $\delta$  138.0, 128.4, 127.6, 73.2, 71.7, 61.0, 37.7, 33.6; LRMS (ESI)  $m/z$  323.16 [(M+Na) $^+$ ]; HRMS (ESI) calcd for  $\text{C}_{19}\text{H}_{24}\text{O}_3\text{Na}$ : 323.1618 [(M+Na) $^+$ ], found: 323.1616.

(((2-(2-azidoethyl)propane-1,3-diyl)bis(oxy))bis(methylene))dibenzene 30

To a solution of alcohol **29** (224 mg, 0.746 mmol) in DCM (3.0 ml) was added triethylamine (156  $\mu\text{l}$ , 1.12 mmol, 1.5 equiv) and MsCl (69.3  $\mu\text{l}$ , 0.895 mmol, 1.2 equiv) at 0 °C. After 30 min at 0 °C, the reaction mixture was diluted with AcOEt, washed with water and brine, dried over  $\text{Na}_2\text{SO}_4$  and the solvent was removed under reduced pressure to give the corresponding mesylated product as a colorless oil.

To a solution of the oil in DMF (2.5 ml) was added  $\text{NaN}_3$  (146 mg, 2.24 mmol, 3.0 equiv). After 3 h at 70 °C, the reaction mixture was diluted with AcOEt, washed with water and brine, dried over  $\text{Na}_2\text{SO}_4$  and the solvent was

removed under reduced pressure. The crude product was purified by silica gel column chromatography (*n*-hexane/ AcOEt 15:1) to yield azide **30** (223 mg, 0.685 mmol, 2 steps 91%) as a colorless oil. <sup>1</sup>H-NMR (400 MHz, CDCl<sub>3</sub>) δ 7.37-7.24 (m, 10H, aromatic), 4.48 (s, 4H, benzyl CH<sub>2</sub>), 3.50 (dd, *J* = 9.4, 5.4 Hz, 2H, OCH<sub>2</sub>CH), 3.46 (dd, *J* = 9.4, 5.4 Hz, 2H, OCH<sub>2</sub>CH), 3.32 (t, *J* = 7.2 Hz, 2H, CH<sub>2</sub>N<sub>3</sub>), 2.05 (m, 1H, CH<sub>2</sub>CHCH<sub>2</sub>), 1.71 (td, *J* = 7.2, 7.2 Hz, 2H, CH<sub>2</sub>CH<sub>2</sub>N<sub>3</sub>); <sup>13</sup>C-NMR (100 MHz, CDCl<sub>3</sub>) δ 138.3, 128.3, 127.5, 73.1, 70.5, 49.5, 37.0, 28.3; LRMS (ESI) *m/z* 348.17 [(M+Na)<sup>+</sup>]; HRMS (ESI) calcd for C<sub>19</sub>H<sub>23</sub>N<sub>3</sub>O<sub>2</sub>Na: 348.1683 [(M+Na)<sup>+</sup>], found: 348.1681.

#### 4-(benzyloxy)-3-((benzyloxy)methyl)butan-1-amine **31**

To a solution of azide **30** (71.1 mg, 0.219 mmol) in THF (2.2 ml) was added PPh<sub>3</sub> (63.0 mg, 0.240 mmol, 1.1 equiv) and water (220 μl). After 9 h at rt, the reaction mixture was refluxed for 22 h. The resulting mixture was concentrated *in vacuo* and the crude product was purified by silica gel column chromatography (*n*-hexane/ AcOEt/ CHCl<sub>3</sub>/ MeOH 1:2:0:0-0:0:1:1-0:0:0:1) to yield amine **31** (68.5 mg, 0.229 mmol, quant.) as a colorless oil. <sup>1</sup>H-NMR (400 MHz, CDCl<sub>3</sub>) δ 7.37-7.23 (m, 10H, aromatic), 4.48 (s, 4H, benzyl CH<sub>2</sub>), 3.50 (dd, *J* = 9.4, 5.8 Hz, 2H, OCH<sub>2</sub>CH), 3.45 (dd, *J* = 9.4, 5.8 Hz, 2H, OCH<sub>2</sub>CH), 2.74 (t, *J* = 7.2 Hz, 2H, CH<sub>2</sub>NH<sub>2</sub>), 2.09-1.92 (m, 1H, CH<sub>2</sub>CHCH<sub>2</sub>), 1.99 (br, 2H, NH<sub>2</sub>), 1.56 (td, *J* = 7.2, 7.2 Hz, 2H, CH<sub>2</sub>CH<sub>2</sub>NH<sub>2</sub>); <sup>13</sup>C-NMR (100 MHz, CDCl<sub>3</sub>) δ 138.5, 128.3, 127.5, 127.5, 73.1, 71.0, 39.9, 37.3, 33.0; LRMS (ESI) *m/z* 300.20 [(M+H)<sup>+</sup>]; HRMS (ESI) calcd for C<sub>19</sub>H<sub>26</sub>NO<sub>2</sub>: 300.1958 [(M+H)<sup>+</sup>], found: 300.1957.

#### Target compound **10**

To a solution of carboxylic acid **19**<sup>1</sup> (46.1 mg, 0.268 mmol, 2.5 equiv) in DCM (3.0 ml) was added triethylamine (37.3 μl, 0.268 mmol, 1.0 equiv) and PivCl (29.7 μl, 0.241 mmol, 2.3 equiv) at 0 °C. After 30 min at 0 °C, the reaction mixture was used as a solution of the corresponding acid anhydride in DCM.

To a solution of amine **31** (32.1 mg, 0.107 mmol, 1.0 equiv) in DCM (1.5 ml) was added triethylamine (22.4 μl, 0.161 mmol, 1.5 equiv) and a solution of the acid anhydride in DCM at 0 °C. After 5 min at 0 °C, the reaction mixture was warmed to rt and stirred for 19 h. The reaction mixture was diluted with AcOEt, washed with 1M HCl, sat. NaHCO<sub>3</sub> and brine, dried over Na<sub>2</sub>SO<sub>4</sub> and the solvent was removed under reduced pressure. The crude product was purified by silica gel column chromatography (*n*-hexane/ AcOEt 3:1) to yield target compound **10** (50.3 mg, 0.111 mmol, quant.) as a colorless oil. [α]<sub>D</sub><sup>24</sup> 9.28 (*c* 0.74, CHCl<sub>3</sub>); <sup>1</sup>H-NMR (500 MHz, CDCl<sub>3</sub>) δ 7.38-7.24 (m, 10H, aromatic), 6.95 (br, 1H, amide NH), 4.53 (d, *J* = 4.6 Hz, 1H, NHCOCH), 4.49 (s, 4H, benzyl CH<sub>2</sub>), 3.56 (dd, *J* = 7.4, 4.6 Hz, 1H, OCOCH), 3.52-3.46 (m, 2H, OCH<sub>2</sub>CH), 3.45-3.29 (m, 4H, OCH<sub>2</sub>CH and CH<sub>2</sub>NH), 2.03-1.91 (m, 2H, CH<sub>2</sub>CHCH<sub>2</sub> and *sec*-butyl CH), 1.72-1.61 (m, 3H, CH<sub>2</sub>CH<sub>2</sub>NH and *sec*-butyl CH<sub>2</sub> (1H)), 1.36-1.24 (m, 1H, *sec*-butyl CH<sub>2</sub>), 1.06 (d, *J* = 6.9 Hz, 3H, *sec*-butyl CH<sub>3</sub>), 0.94 (dd, *J* = 7.4, 7.4 Hz, 3H, *sec*-butyl CH<sub>3</sub>); <sup>13</sup>C-NMR (125 MHz, CHCl<sub>3</sub>) δ 169.3, 167.8, 138.1, 128.4, 128.4, 127.7, 127.6, 127.6, 73.2, 71.1, 71.0, 70.7, 62.8, 37.8, 37.6, 33.8, 29.1, 26.6, 16.3, 11.0; LRMS (ESI) *m/z* 454.26 [(M+H)<sup>+</sup>]; HRMS (ESI) calcd for C<sub>27</sub>H<sub>36</sub>NO<sub>5</sub>: 454.2588 [(M+H)<sup>+</sup>], found: 454.2595.

#### 5-(benzyloxy)-4-((benzyloxy)methyl)pentanenitrile **32**

To a solution of alcohol **29** (279 mg, 0.929 mmol) in DCM (3.7 ml) was added triethylamine (193 μl, 1.39 mmol, 1.5 equiv) and MsCl (86.3 μl, 1.11 mmol, 1.2 equiv) at 0 °C. After 30 min at 0 °C, the reaction mixture was diluted with AcOEt, washed with water and brine, dried over Na<sub>2</sub>SO<sub>4</sub> and the solvent was removed under reduced pressure to give

the corresponding mesylated product as a colorless oil.

To a solution of the oil in DMSO (1.0 ml) was added NaCN (273 mg, 5.57 mmol, 6.0 equiv). After 3 h at 60 °C, the reaction mixture was diluted with AcOEt, washed with water and brine, dried over Na<sub>2</sub>SO<sub>4</sub> and the solvent was removed under reduced pressure. The crude product was purified by silica gel column chromatography (*n*-hexane/ AcOEt 7:1) to yield nitrile **32** (282 mg, 0.910 mmol, 2 steps 98%) as a colorless oil. <sup>1</sup>H-NMR (400 MHz, CDCl<sub>3</sub>) δ 7.38-7.25 (m, 10H, aromatic), 4.47 (s, 4H, benzyl CH<sub>2</sub>), 3.50 (dd, *J* = 9.4, 5.8 Hz, 2H, OCH<sub>2</sub>CH), 3.45 (dd, *J* = 9.4, 5.4 Hz, 2H, OCH<sub>2</sub>CH), 2.38 (t, *J* = 7.2 Hz, 2H, CH<sub>2</sub>CN), 2.06 (m, 1H, CH<sub>2</sub>CHCH<sub>2</sub>), 1.80 (td, *J* = 7.2, 7.2 Hz, 2H, CH<sub>2</sub>CH<sub>2</sub>CN); <sup>13</sup>C-NMR (100 MHz, CDCl<sub>3</sub>) δ 138.1, 128.4, 127.6, 127.5, 119.9, 73.1, 70.2, 38.4, 25.2, 15.1; LRMS (ESI) *m/z* 332.16 [(M+Na)<sup>+</sup>]; HRMS (ESI) calcd for C<sub>20</sub>H<sub>23</sub>NO<sub>2</sub>Na: 332.1620 [(M+Na)<sup>+</sup>], found: 332.1620.

### Target compound **12**

To a solution of LiAlH<sub>4</sub> (20.7 mg, 0.546 mmol, 4.4 equiv) in Et<sub>2</sub>O (1.0 ml) was added nitrile **32** (38.4 mg, 0.124 mmol) in Et<sub>2</sub>O (1.0 ml) *via cannula* at 0 °C. After 5 min at 0 °C, the reaction mixture was warmed to rt and stirred for 5 h. To the reaction mixture was added water (20.7 μl), 15% NaOH (20.7 μl) and water (62.1 μl) at 0 °C and the resulting mixture was vigorously stirred at rt for 1 h. The mixture was filtered through a Celite pad and the filtrate was concentrated *in vacuo* to give the corresponding amine as a colorless oil.

To a solution of carboxylic acid **19**<sup>1</sup> (53.4 mg, 0.310 mmol, 2.5 equiv) in DCM (3.0 ml) was added triethylamine (43.1 μl, 0.310 mmol, 2.5 equiv) and PivCl (34.4 μl, 0.279 mmol, 2.3 equiv) at 0 °C. After 30 min at 0 °C, the reaction mixture was used as a solution of the corresponding acid anhydride in DCM.

To a solution of the aforementioned amine in DCM (1.2 ml) was added triethylamine (25.9 μl, 0.186 mmol, 1.5 equiv) and a solution of the acid anhydride in DCM at 0 °C. After 5 min at 0 °C, the reaction mixture was warmed to rt and stirred for 19 h. The reaction mixture was diluted with AcOEt, washed with 1 M HCl, sat. NaHCO<sub>3</sub> and brine, dried over Na<sub>2</sub>SO<sub>4</sub> and the solvent was removed under reduced pressure. The crude product was purified by silica gel column chromatography (*n*-hexane/ AcOEt 3:1) to yield target compound **12** (58.5 mg, 0.125 mmol, 2 steps quant.) as a colorless oil. [α]<sub>D</sub><sup>24</sup> 13.20 (*c* 1.05, CHCl<sub>3</sub>); <sup>1</sup>H-NMR (500 MHz, CDCl<sub>3</sub>) δ 7.37-7.25 (m, 10H, aromatic), 6.41 (br, 1H, amide NH), 4.56 (d, *J* = 4.6 Hz, 1H, NHCOCH), 4.48 (s, 4H, benzyl CH<sub>2</sub>), 3.56 (dd, *J* = 8.0, 4.6 Hz, 1H, OCOCH), 3.49 (dd, *J* = 9.2, 5.7 Hz, 2H, OCH<sub>2</sub>CH), 3.44 (dd, *J* = 9.2, 5.7 Hz, 2H, OCH<sub>2</sub>CH), 3.37-3.20 (m, 2H, CH<sub>2</sub>NH), 2.02-1.88 (m, 2H, NHCOCH and CH<sub>2</sub>CHCH<sub>2</sub>), 1.71-1.61 (m, 1H, *sec*-butyl CH), 1.59-1.50 (m, 2H, CH<sub>2</sub>CH<sub>2</sub>NH), 1.47-1.39 (m, 2H, CH<sub>2</sub>CH<sub>2</sub>CH<sub>2</sub>NH), 1.37-1.26 (m, 1H, *sec*-butyl CH<sub>2</sub>), 1.07 (d, *J* = 6.3 Hz, 3H, *sec*-butyl CH<sub>3</sub>), 0.94 (dd, *J* = 7.4, 7.4 Hz, 3H, *sec*-butyl CH<sub>3</sub>); <sup>13</sup>C-NMR (125 MHz, CDCl<sub>3</sub>) δ 169.2, 167.8, 138.5, 128.3, 127.6, 127.5, 73.1, 70.7, 62.9, 39.4, 39.0, 33.8, 26.8, 26.6, 25.9, 16.3, 11.0; LRMS (ESI) *m/z* 468.28 [(M+H)<sup>+</sup>]; HRMS (ESI) calcd for C<sub>28</sub>H<sub>38</sub>NO<sub>5</sub>: 468.2745 [(M+H)<sup>+</sup>], found: 468.2754.

### Flexible alignment of compounds **5-12**

Flexible alignment of compounds **5-12** onto previously analyzed non-covalent binding conformation of compound **4**<sup>4</sup> and covalent binding conformation of homobelactosin C derivatives analyzed by Meijere *et al.*<sup>5, 6</sup> was performed by using Molecular Operating Environment (MOE) 2012.10. Prior to the calculation, β-lactone ring of compounds **5-12** was superimposed with that of **4** and the position was fixed during the calculation. Default values were used for all parameters and the top ranked pose of each compounds were shown in this paper.

### Proteasomes assay

Inhibitory activity of the target compounds **5-12** on ChT-L activity of the human 20S proteasome was measured as described previously.<sup>7</sup>

### Cell proliferation assay

Inhibitory activity of the target compounds **5-12** on HCT116 cell growth was measured as described previously.<sup>7</sup>

### BEI and SEI values of analogs of **4** with same scaffold

**Table S1.** BEI and SEI values of analogs of **4** with same scaffold

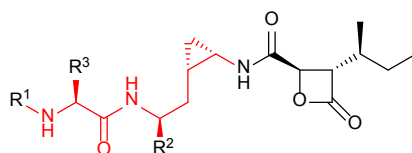

| compound number | R <sup>1</sup> | R <sup>2</sup>   | R <sup>3</sup>  | BEI | SEI |
|-----------------|----------------|------------------|-----------------|-----|-----|
| <b>S1</b>       | Cbz            | vinyl            | Me              | 35  | 14  |
| <b>S2</b>       | H              | vinyl            | Me              | 43  | 14  |
| <b>S3</b>       | Cbz            | vinyl            | epi-Me          | 34  | 14  |
| <b>S4</b>       | Cbz            | vinyl            | H               | 36  | 14  |
| <b>S5</b>       | Cbz            | vinyl            | isobutyl        | 32  | 14  |
| <b>S6</b>       | Cbz            | vinyl            | Bn              | 31  | 14  |
| <b>S7</b>       | Cbz            | vinyl            | 3-indolylmethyl | 29  | 13  |
| <b>S8</b>       | Ac             | vinyl            | Me              | 39  | 13  |
| <b>S9</b>       | Bz             | vinyl            | Me              | 36  | 14  |
| <b>S10</b>      | 2-naphthoyl    | vinyl            | Me              | 35  | 15  |
| <b>S11</b>      | Boc            | vinyl            | Me              | 36  | 13  |
| <b>S12</b>      | Cbz            | Et               | Me              | 35  | 14  |
| <b>S13</b>      | Cbz            | Ph               | Me              | 30  | 13  |
| <b>S14</b>      | Cbz            | Bn               | Me              | 33  | 15  |
| <b>S15</b>      | Cbz            | phenylpropyl     | Me              | 30  | 14  |
| <b>S16</b>      | Cbz            | 1-naphthylmethyl | Me              | 26  | 13  |
| <b>S17</b>      | Cbz            | 2-naphthylmethyl | Me              | 26  | 13  |
| <b>S18</b>      | Cbz            | 1-naphthylethyl  | Me              | 27  | 13  |
| <b>S19</b>      | Cbz            | 2-naphthylethyl  | Me              | 28  | 14  |
| <b>S20</b>      | 2-naphthoyl    | phenethyl        | Me              | 32  | 16  |

## Combustion analysis data for the target compounds

**Table S2.** Table listing combustion analysis data for the target compounds.

|           |                                                                                  |                                    |
|-----------|----------------------------------------------------------------------------------|------------------------------------|
| <b>5</b>  | Anal. calcd for $C_{26}H_{34}N_2O_3$ : C, 73.90; H, 8.11; N, 6.63.               | Found: C, 73.71; H, 8.21; N, 6.64. |
| <b>6</b>  | Anal. calcd for $C_{28}H_{38}N_2O_3$ : C, 74.63; H, 8.50; N, 6.22.               | Found: C, 74.34; H, 8.61; N, 6.15. |
| <b>7</b>  | Anal. calcd for $C_{27}H_{36}N_2O_3 \cdot 0.1H_2O$ : C, 73.97; H, 8.32; N, 6.39. | Found: C, 73.80; H, 8.44; N, 6.29. |
| <b>8</b>  | Anal. calcd for $C_{29}H_{40}N_2O_3 \cdot 0.2H_2O$ : C, 74.39; H, 8.70; N, 5.98. | Found: C, 74.38; H, 8.77; N, 5.91. |
| <b>9</b>  | Anal. calcd for $C_{25}H_{31}NO_5$ : C, 70.57; H, 7.34; N, 3.29.                 | Found: C, 70.37; H, 7.41; N, 3.32. |
| <b>10</b> | Anal. calcd for $C_{27}H_{35}NO_5$ : C, 71.50; H, 7.78; N, 3.09.                 | Found: C, 71.26; H, 7.86; N, 3.11. |
| <b>11</b> | Anal. calcd for $C_{26}H_{33}NO_5$ : C, 71.05; H, 7.57; N, 3.19.                 | Found: C, 70.86; H, 7.61; N, 3.19. |
| <b>12</b> | Anal. calcd for $C_{28}H_{37}NO_5$ : C, 71.92; H, 7.98; N, 3.00.                 | Found: C, 71.66; H, 7.94; N, 3.06. |

## References

1. A. Armstrong and J. N. Scutt, *Chem. Commun.*, 2004, 510.
2. P.-J. Colson and L. S. Hegedus, *J. Org. Chem.*, 1994, **59**, 4972.
3. N. Vignola and B. List, *J. Am. Chem. Soc.*, 2003, **126**, 450.
4. S. Kawamura, Y. Unno, M. Tanaka, T. Sasaki, A. Yamano, T. Hirokawa, T. Kameda, A. Asai, M. Arisawa and S. Shuto, *J. Med. Chem.*, 2013, **56**, 5829.
5. V. S. Korotkov, A. Ludwig, O. V. Larionov, A. V. Lygin, M. Groll and A. de Meijere, *Org. Biomol. Chem.*, 2011, **9**, 7791.
6. M. Groll, O. V. Larionov, R. Huber and A. De Meijere, *Proc. Natl. Acad. Sci. U. S. A.*, 2006, **103**, 4576.
7. S. Kawamura, Y. Unno, A. List, A. Mizuno, M. Tanaka, T. Sasaki, M. Arisawa, A. Asai, M. Groll and S. Shuto, *J. Med. Chem.*, 2013, **56**, 3689.
